# Supplementary material for: Co-Administration of Propionate or Protocatechuic Acid Does Not Affect DHA-Specific Transcriptional Effects on Lipid Metabolism in Cultured Hepatic Cells
Source: MDPI journal article supplement (doi:10.3390/nu12102952), 2020-09-26
Supplement: s1 [file s1]

## SUPPLEMENTARY DATA

### SUPPLEMENTARY FIGURES

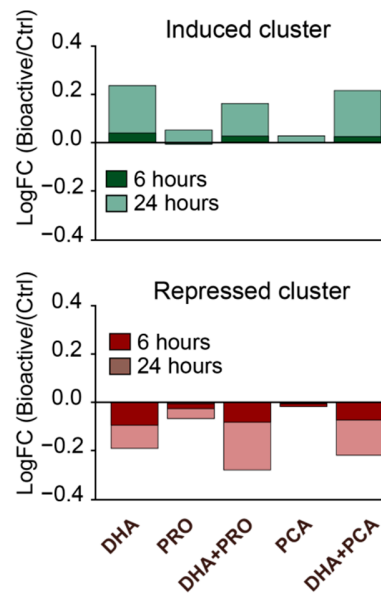

**Figure S1.** Gene expression change after 6 h and 24 h supplementation. Aggregate bar plots illustrating log<sub>2</sub> fold change (FC) in the expression of genes assigned to the induced (green) and repressed (red) clusters with 6 (saturated color) and 24 hours (pale color) bioactive supplementation.

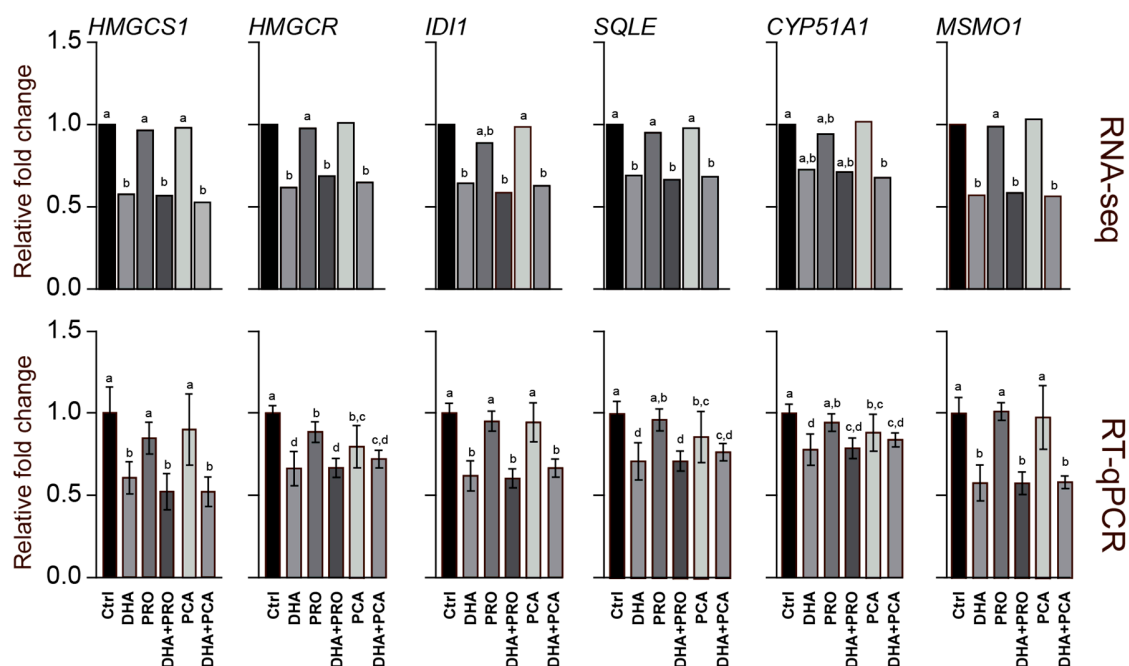

**Figure S2.** Comparison of transcriptional effects of 6 h exposure to DHA, PRO and PCA on genes involved in steroid biosynthesis (3-hydroxy-3-methylglutaryl-CoA synthase 1, *HMGCS1*; 3-hydroxy-3-methylglutaryl-CoA reductase, *HMGCR*; isopentenyl-diphosphate  $\Delta$  isomerase 1, *IDI1*; squalene epoxidase, *SQLE*; cytochrome P450 family 51 subfamily A polypeptide 1, *CYP51A1*; methylsterol monooxygenase 1, *MSMO1*) mapped by RNA-seq and RT-qPCR. Data are represented as the mean fold change of relative expression compared to Ctrl cells. Statistical analysis was carried out using one-way ANOVA followed by Tukey's HSD test. Different letters indicate statistical significance ( $p < 0.05$ ).

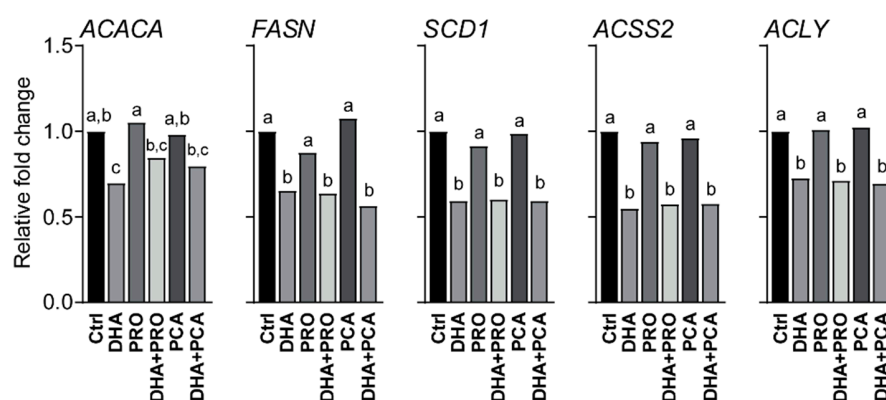

**Figure S3.** Comparison of transcriptional effects on genes involved in fatty acid biosynthesis (acetyl-CoA carboxylase 1, *ACACA*; fatty acid synthase, *FASN*; stearoyl-CoA desaturase 1, *SCD1*; acyl-coenzyme A synthetase short-chain family member 2, *ACSS2*; ATP citrate lyase, *ACLY*) of bioactives on HepG2 cells mapped by RNA-seq. Bar plots representing gene expression in Ctrl and supplemented cells after 24 h of supplementation. Data are represented as the mean fold change of relative expression compared to Ctrl cells. Statistical analysis was carried out using one-way ANOVA followed by Tukey's HSD test. Different letters indicate statistical significance ( $p < 0.05$ ).

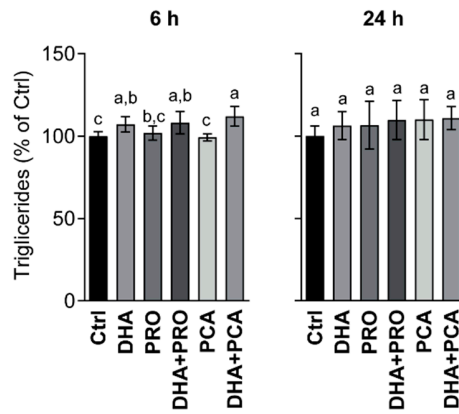

**Figure S4.** Intracellular triglyceride content in control (Ctrl) and supplemented cells after 6 h and 24 h supplementation. Data are expressed as the percentage of the value obtained in control cells (assigned as 100%). Statistical analysis was carried out using one-way ANOVA followed by Tukey's HSD test. Different letters indicate statistical significance ( $p < 0.05$ ).

# SUPPLEMENTARY TABLES

**Table S1.** Primers used for RT-qPCR.

| Gene name                                                        | GenBank accession number | Primer sequence                                        |
|------------------------------------------------------------------|--------------------------|--------------------------------------------------------|
| <b>Reference genes</b>                                           |                          |                                                        |
| <i>ACTB</i><br>β-actin                                           | NG_007992.1              | F: ATGTGGCCGAGGACTTTGATT<br>R: AGTGGGGTGGCTTTTAGGATG   |
| <i>GAPDH</i><br>glyceraldehyde-3-phosphate dehydrogenase         | NG_007073.2              | F: AAGGTGAAGGTCGGAGTCAA<br>R: AATGAAGGGGTCATTGATGG     |
| <i>HMBS</i><br>hydroxymethylbilane synthase                      | NG_008093.1              | F: ACCAAGGAGCTTGAACATGC<br>R: GAAAGACAACAGCATCATGAG    |
| <i>SDHA</i><br>subunit A of succinate dehydrogenase complex      | NG_012339.1              | F: TGGGAACAAGAGGGCATCTG<br>R: CCACCACTGCATCAAATTCATG   |
| <b>Target genes</b>                                              |                          |                                                        |
| <i>CYP51A1</i><br>cytochrome P450 family 51 subfamily A member 1 | NG_007968.1              | F: CCTTTGCCTAGTTTCAGACGC<br>R: GACTGTCTGCGTTTCTGGATTG  |
| <i>HMGCR</i><br>3-hydroxy-3-methylglutaryl-CoA reductase         | NG_011449.1              | F: TGTCAGGGGTACGTCAGCTT<br>R: AGGACACACAAGCTGGGAAG     |
| <i>HMGCS1</i><br>3-hydroxy-3-methylglutaryl-CoA synthase 1       | NC_000005.10             | F: CCAGTGGCAGAAAGAGGGAA<br>R: GTCATTGAGCAACATCCGAGC    |
| <i>IDI1</i><br>isopentenyl-diphosphate Δ isomerase 1             | NC_000010.11             | F: ACTAACCACCTCGACAAGCAA<br>R: TCCTTTCTCAATGTTCTCGTTCA |
| <i>MSMO1</i><br>methylsterol monooxygenase 1                     | NG_042288.1              | F: TCCAGCTGCCTTTGATTTGTG<br>R: CAATGACTGCACAACCAAAGC   |
| <i>SQLE</i><br>squalene epoxidase                                | NC_000008.11             | F: AGGCGCAGAAAAGGAACCAA<br>R: GCCAGCTCCCACGATGATAA     |

**Table S2.** Fatty acid (FA) composition of HepG2 cells (a) after 6 h and (b) after 24 h supplementation.

| (a)     |                                   |                                 |                                 |                                   |                                |                                   |
|---------|-----------------------------------|---------------------------------|---------------------------------|-----------------------------------|--------------------------------|-----------------------------------|
| FA      | Ctrl                              | 50 $\mu$ M DHA                  | 70 $\mu$ M PRO                  | 50 $\mu$ M DHA<br>+70 $\mu$ M PRO | 20 $\mu$ M PCA                 | 50 $\mu$ M DHA<br>+20 $\mu$ M PCA |
| 3:0     | 0.10 $\pm$ 0.13 <sup>a</sup>      | 0.10 $\pm$ 0.11 <sup>a</sup>    | 0.19 $\pm$ 0.14 <sup>a</sup>    | 0.03 $\pm$ 0.07 <sup>a</sup>      | 0.05 $\pm$ 0.05 <sup>a</sup>   | 0.04 $\pm$ 0.05 <sup>a</sup>      |
| 14:0    | 1.94 $\pm$ 0.58 <sup>a</sup>      | 2.33 $\pm$ 0.72 <sup>a</sup>    | 1.53 $\pm$ 0.77 <sup>a</sup>    | 1.96 $\pm$ 0.26 <sup>a</sup>      | 1.70 $\pm$ 0.77 <sup>a</sup>   | 2.14 $\pm$ 0.17 <sup>a</sup>      |
| 16:0    | 33.54 $\pm$ 2.71 <sup>a</sup>     | 31.99 $\pm$ 0.84 <sup>a</sup>   | 32.29 $\pm$ 0.59 <sup>a</sup>   | 31.51 $\pm$ 0.93 <sup>a</sup>     | 32.32 $\pm$ 1.13 <sup>a</sup>  | 31.33 $\pm$ 0.16 <sup>a</sup>     |
| 16:1n-7 | 2.55 $\pm$ 0.57 <sup>a</sup>      | 2.70 $\pm$ 0.56 <sup>a</sup>    | 2.71 $\pm$ 0.75 <sup>a</sup>    | 2.59 $\pm$ 0.27 <sup>a</sup>      | 2.97 $\pm$ 0.43 <sup>a</sup>   | 2.93 $\pm$ 0.17 <sup>a</sup>      |
| 18:0    | 29.45 $\pm$ 4.32 <sup>a</sup>     | 25.66 $\pm$ 2.54 <sup>a</sup>   | 28.23 $\pm$ 2.16 <sup>a</sup>   | 25.93 $\pm$ 1.42 <sup>a</sup>     | 27.19 $\pm$ 1.17 <sup>a</sup>  | 25.38 $\pm$ 2.39 <sup>a</sup>     |
| 18:1n-9 | 9.49 $\pm$ 3.33 <sup>a</sup>      | 10.13 $\pm$ 1.76 <sup>a</sup>   | 10.72 $\pm$ 1.72 <sup>a</sup>   | 8.74 $\pm$ 0.90 <sup>a</sup>      | 10.27 $\pm$ 1.67 <sup>a</sup>  | 9.03 $\pm$ 1.34 <sup>a</sup>      |
| 18:1n-7 | 10.55 $\pm$ 1.11 <sup>a,b,c</sup> | 8.32 $\pm$ 0.83 <sup>c</sup>    | 11.18 $\pm$ 0.96 <sup>a,b</sup> | 8.91 $\pm$ 0.97 <sup>b,c</sup>    | 11.52 $\pm$ 1.17 <sup>a</sup>  | 9.07 $\pm$ 1.12 <sup>b,c</sup>    |
| 18:2n-6 | 0.40 $\pm$ 0.13 <sup>a</sup>      | 0.43 $\pm$ 0.22 <sup>a</sup>    | 0.42 $\pm$ 0.17 <sup>a</sup>    | 0.39 $\pm$ 0.05 <sup>a</sup>      | 0.41 $\pm$ 0.07 <sup>a</sup>   | 0.37 $\pm$ 0.07 <sup>a</sup>      |
| 18:3n-3 | 0.55 $\pm$ 0.12 <sup>a</sup>      | 0.67 $\pm$ 0.15 <sup>a</sup>    | 0.52 $\pm$ 0.26 <sup>a</sup>    | 0.51 $\pm$ 0.04 <sup>a</sup>      | 0.48 $\pm$ 0.21 <sup>a</sup>   | 0.49 $\pm$ 0.05 <sup>a</sup>      |
| 20:4n-6 | 9.72 $\pm$ 2.43 <sup>a</sup>      | 9.02 $\pm$ 1.43 <sup>a</sup>    | 10.97 $\pm$ 0.99 <sup>a</sup>   | 10.66 $\pm$ 1.41 <sup>a</sup>     | 11.65 $\pm$ 1.54 <sup>a</sup>  | 10.48 $\pm$ 1.36 <sup>a</sup>     |
| 20:5n-3 | 0.38 $\pm$ 0.03 <sup>a</sup>      | 0.40 $\pm$ 0.08 <sup>a</sup>    | 0.37 $\pm$ 0.05 <sup>a</sup>    | 0.66 $\pm$ 0.72 <sup>a</sup>      | 0.42 $\pm$ 0.27 <sup>a</sup>   | 0.32 $\pm$ 0.03 <sup>a</sup>      |
| 22:6n-3 | 1.34 $\pm$ 0.45 <sup>b</sup>      | 8.25 $\pm$ 1.17 <sup>a</sup>    | 0.86 $\pm$ 0.39 <sup>b</sup>    | 8.11 $\pm$ 1.39 <sup>a</sup>      | 1.02 $\pm$ 0.28 <sup>b</sup>   | 8.41 $\pm$ 0.03 <sup>a</sup>      |
| (b)     |                                   |                                 |                                 |                                   |                                |                                   |
| FA      | Ctrl                              | 50 $\mu$ M DHA                  | 70 $\mu$ M PRO                  | 50 $\mu$ M DHA<br>+70 $\mu$ M PRO | 20 $\mu$ M PCA                 | 50 $\mu$ M DHA<br>+20 $\mu$ M PCA |
| 3:0     | 0.68 $\pm$ 0.30 <sup>a</sup>      | 1.12 $\pm$ 1.15 <sup>a</sup>    | 0.66 $\pm$ 0.19 <sup>a</sup>    | 1.18 $\pm$ 1.48 <sup>a</sup>      | 1.17 $\pm$ 1.24 <sup>a</sup>   | 0.71 $\pm$ 0.48 <sup>a</sup>      |
| 14:0    | 3.11 $\pm$ 0.15 <sup>a</sup>      | 3.37 $\pm$ 0.82 <sup>a</sup>    | 3.54 $\pm$ 0.98 <sup>a</sup>    | 3.85 $\pm$ 0.36 <sup>a</sup>      | 3.76 $\pm$ 0.66 <sup>a</sup>   | 3.68 $\pm$ 0.40 <sup>a</sup>      |
| 16:0    | 29.85 $\pm$ 1.18 <sup>a</sup>     | 28.45 $\pm$ 2.13 <sup>a</sup>   | 29.06 $\pm$ 1.89 <sup>a</sup>   | 28.09 $\pm$ 1.02 <sup>a</sup>     | 29.62 $\pm$ 0.99 <sup>a</sup>  | 28.34 $\pm$ 0.52 <sup>a</sup>     |
| 16:1n-7 | 4.62 $\pm$ 0.83 <sup>a,b,c</sup>  | 3.89 $\pm$ 0.43 <sup>c</sup>    | 5.70 $\pm$ 1.050 <sup>a</sup>   | 4.24 $\pm$ 0.21 <sup>a,b,c</sup>  | 5.62 $\pm$ 1.01 <sup>a,b</sup> | 4.05 $\pm$ 0.32 <sup>b,c</sup>    |
| 18:0    | 27.10 $\pm$ 5.36 <sup>a</sup>     | 21.60 $\pm$ 3.97 <sup>a,b</sup> | 18.15 $\pm$ 3.63 <sup>b</sup>   | 17.65 $\pm$ 2.40 <sup>b</sup>     | 17.48 $\pm$ 1.72 <sup>b</sup>  | 17.40 $\pm$ 3.49 <sup>b</sup>     |
| 18:1n-9 | 17.16 $\pm$ 2.47 <sup>b</sup>     | 14.48 $\pm$ 1.25 <sup>b</sup>   | 21.41 $\pm$ 0.80 <sup>a</sup>   | 15.53 $\pm$ 0.80 <sup>b</sup>     | 21.08 $\pm$ 0.83 <sup>a</sup>  | 15.45 $\pm$ 1.04 <sup>b</sup>     |
| 18:1n-7 | 10.88 $\pm$ 1.63 <sup>b</sup>     | 7.78 $\pm$ 0.94 <sup>c</sup>    | 13.63 $\pm$ 0.24 <sup>a</sup>   | 8.42 $\pm$ 0.47 <sup>c</sup>      | 13.68 $\pm$ 0.43 <sup>a</sup>  | 8.20 $\pm$ 0.60 <sup>c</sup>      |
| 18:2n-6 | 0.82 $\pm$ 0.18 <sup>a</sup>      | 0.41 $\pm$ 0.05 <sup>b</sup>    | 0.96 $\pm$ 0.08 <sup>a</sup>    | 0.44 $\pm$ 0.02 <sup>b</sup>      | 0.94 $\pm$ 0.13 <sup>a</sup>   | 0.41 $\pm$ 0.02 <sup>b</sup>      |
| 18:3n-3 | 0.86 $\pm$ 0.16 <sup>a,b</sup>    | 0.66 $\pm$ 0.06 <sup>b</sup>    | 1.05 $\pm$ 0.09 <sup>a</sup>    | 0.68 $\pm$ 0.05 <sup>b</sup>      | 1.06 $\pm$ 0.11 <sup>a</sup>   | 0.70 $\pm$ 0.06 <sup>b</sup>      |
| 20:4n-6 | 1.60 $\pm$ 0.26 <sup>a</sup>      | 1.39 $\pm$ 0.39 <sup>a</sup>    | 2.15 $\pm$ 0.79 <sup>a</sup>    | 1.87 $\pm$ 0.36 <sup>a</sup>      | 2.12 $\pm$ 0.11 <sup>a</sup>   | 1.98 $\pm$ 0.46 <sup>a</sup>      |
| 20:5n-3 | 0.69 $\pm$ 0.60 <sup>a</sup>      | 0.38 $\pm$ 0.44 <sup>a</sup>    | 0.71 $\pm$ 0.84 <sup>a</sup>    | 0.25 $\pm$ 0.42 <sup>a</sup>      | 0.64 $\pm$ 0.82 <sup>a</sup>   | 0.63 $\pm$ 0.48 <sup>a</sup>      |
| 22:6n-3 | 2.62 $\pm$ 0.81 <sup>b</sup>      | 16.48 $\pm$ 3.01 <sup>a</sup>   | 2.99 $\pm$ 0.96 <sup>b</sup>    | 17.81 $\pm$ 1.11 <sup>a</sup>     | 2.83 $\pm$ 0.75 <sup>b</sup>   | 18.44 $\pm$ 0.82 <sup>a</sup>     |

Data are expressed as mol % and are means  $\pm$  SD of four samples in each group derived from two independent experiments. Statistical analysis was by the one-way ANOVA followed by Tukey's HSD test. Different letters in the same row indicate statistical significance ( $p < 0.05$ ).

**Table S3.** Total FA, PUFA, and DHA content in control (Ctrl) and supplemented cells after 24 h supplementation.

| FA content<br>( $\mu\text{g}/10^6$ cells) | Ctrl                          | 50 $\mu\text{M}$ DHA          | 50 $\mu\text{M}$ DHA<br>+70 $\mu\text{M}$ PRO | 50 $\mu\text{M}$ DHA<br>+20 $\mu\text{M}$ PCA |
|-------------------------------------------|-------------------------------|-------------------------------|-----------------------------------------------|-----------------------------------------------|
| Total FAs<br>other than DHA               | 51.47 $\pm$ 7.28 <sup>a</sup> | 42.81 $\pm$ 7.25 <sup>a</sup> | 41.32 $\pm$ 6.56 <sup>a</sup>                 | 46.44 $\pm$ 10.36 <sup>a</sup>                |
| Total PUFAs<br>other than DHA             | 2.07 $\pm$ 0.26 <sup>a</sup>  | 1.43 $\pm$ 0.09 <sup>b</sup>  | 1.61 $\pm$ 0.16 <sup>a,b</sup>                | 2.10 $\pm$ 0.41 <sup>a</sup>                  |

Data are means  $\pm$  SD of four samples in each group derived from two independent experiments and are calculated from previously published values [20]. Statistical analysis was carried out using one-way ANOVA followed by Tukey's HSD test.

Different letters in the same row indicate statistical significance ( $p < 0.05$ ).

## References

- Ghini, V.; Di Nunzio, M.; Tenori, L.; Valli, V.; Danesi, F.; Capozzi, F.; Luchinat, C.; Bordoni, A., Evidence of a DHA signature in the lipidome and metabolome of human hepatocytes. *Int J Mol Sci* **2017**, *18*, 359.
